# Supplementary material
Source: Springer Nature journal article supplement (https://www.springermedizin.de/resource/supplementary/12889_2006_518_MOESM1_ESM.pdf/9501070)
Supplement: MOESM1 [file 9501070]

MEDLINE, Meditext, PsycINFO, Web of Science (August 2005)

- **chlamydia**
- **attitude**
- **attitude to health**
- **interview**
- **qualitative**
- **women**

exploded  
MeSH text  
words

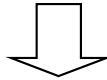

MEDLINE:  
chlamydia AND  
attitude AND  
attitude to health  
limited to humans  
AND English  
= 232 articles

MEDLINE:  
chlamydia AND  
interview limited to  
humans AND English  
= 81 articles

MEDLINE:  
chlamydia AND  
qualitative  
limited to humans  
AND English  
= 35 articles

PsycINFO:  
chlamydia AND  
attitude  
= 125 articles

PsycINFO:  
chlamydia AND  
interview  
= 41 articles

PsycINFO:  
chlamydia AND  
women  
= 33 articles

Meditext:  
chlamydia AND  
attitude  
= 6 articles

Web of Science:  
chlamydia AND  
attitude  
= 8 articles

hand searching references of  
relevant articles and discussion  
with other researchers

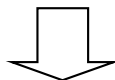

Contains interviews, surveys or focus groups  
= 25 articles for review
